# Supplementary material
Source: Springer Nature journal article supplement (https://www.springermedizin.de/resource/supplementary/12957_2011_895_MOESM3_ESM.pdf/9565746)

| Study or Subgroup                                     | MG     |           | SG     |           | Weight        | Odds Ratio               | Odds Ratio                                                                          |
|-------------------------------------------------------|--------|-----------|--------|-----------|---------------|--------------------------|-------------------------------------------------------------------------------------|
|                                                       | Events | Total     | Events | Total     |               | M-H, Fixed, 95% CI       | M-H, Fixed, 95% CI                                                                  |
| Avilés 2005                                           | 42     | 80        | 72     | 83        | 100.0%        | 0.17 [0.08, 0.37]        |  |
| <b>Total (95% CI)</b>                                 |        | <b>80</b> |        | <b>83</b> | <b>100.0%</b> | <b>0.17 [0.08, 0.37]</b> |  |
| Total events                                          | 42     |           | 72     |           |               |                          |                                                                                     |
| Heterogeneity: Not applicable                         |        |           |        |           |               |                          |                                                                                     |
| Test for overall effect: $Z = 4.52$ ( $P < 0.00001$ ) |        |           |        |           |               |                          |                                                                                     |

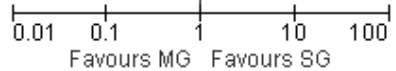

Supplement: MOESM3 [file 9565746]
